# Supplementary material for: Invasive Breast Cancer Incidence in 2,305,427 Screened Asymptomatic Women: Estimated Long Term Outcomes during Menopause Using a Systematic Review
Source: PLOS journal article supplement (doi:10.1371/journal.pone.0128895), 2015-06-24
Supplement: S2 (10.1371/journal.pone.0128895.s002) [file journal.pone.0128895.s002]

# Card Reference List

|                                                                                  |                                    |                                                                                                  |
|----------------------------------------------------------------------------------|------------------------------------|--------------------------------------------------------------------------------------------------|
| <b>Authors</b><br>Chen CL, Weiss NS, Newcomb P, Barlow W, White, E               | <b>Year</b><br>2002                | <b>CardRefID</b><br>Ref-A--0001                                                                  |
| <b>Article Title</b><br>Hormone replacement therapy in relation to breast cancer | <b>PrimaryTopic</b><br>HRT: Breast | <b>Related Topics:</b> ( )<br>These files are moved so they won't open<br>Portal to "all fields" |
|                                                                                  | <b>Journal</b><br>JAMA             |                                                                                                  |
| <b>Ref_Citation</b><br>JAMA 287(6):734-741                                       | <b>Vol.</b><br>287                 | <b>Page Range</b><br>734-741                                                                     |

|                |            |
|----------------|------------|
| Date Initiated | 1/12/05    |
| Staffer        | RN         |
| WBC Card Date  | 7/22/04    |
| Carding_Status | complete   |
| AccuracyCheck  | LB 7/20/06 |

| ChapterID | MS   | chapter# | chapter_name_lkp | WBCArticleID   |
|-----------|------|----------|------------------|----------------|
| X 029-C   | WHAT | 11       | Preserving       | Ref-A- WBC-001 |
| X 032-C   | WHAT | 12       | Protecting the   | Ref-A- WBC-001 |
| X         |      |          |                  |                |

WBCUsedRefDetail ⑦ portal

Add New Chapter/Edit Chapters Add ALL

## WBC Summary

Cited by Li et al JAMA 2003 Friday, July 9, 2004 we need this one to see how they defined sequential HRT (definitions turned out to be "Women who had a different number of estrogen and progestin pills in each prescription (usually 25 e with 10 p pills) were considered sequential therapy users."

This study of enrollees of the Group Health Cooperative of Puget sound (GHC) focused on histological eval of lobular (rare but increasing) vs ductal breast cancer and HRT.

Cases: 705 of 752 women newly diagnosed with a first primary invasive breast cancer betwe 7/1/90 and 12/31/95 aged 50 to 74.

q Reference date for each case was 1 yr before the diagnosis

Controls: 692 of 752 randomly selected from GHC enrollment files and match by diag yr, age, and enrollment duration in GHC. Ref date = that of the case HRT use info 2 ways: pharmacy db and for longer duration pre enrollment, via GHC Breast questionnaire (completed by 85%

q Oral hormone use apparently not daily but 25 days a month since sequential described that way shown above) pill types were converted to equivalencies to CEE and MPA for measures of months of use by dose.

q Women were considered premenopausal and excluded if they reported menstrual periods after the ref date.

Hence this study does not consider breast cancer in

## Notes4Text

## Notes4Marketing

## Notes4Graphics

## Notes4Permissions

Created

Modified 6/2/2008

5:31:13 PM Unit 1

Word\_Doc\_Name

H&M-fir  
Refs
