# Supplementary material for: Invasive Breast Cancer Incidence in 2,305,427 Screened Asymptomatic Women: Estimated Long Term Outcomes during Menopause Using a Systematic Review
Source: PLoS One. 2015 Jun 24;10(6):e0128895. doi: 10.1371/journal.pone.0128895 (PMC4479875; doi:10.1371/journal.pone.0128895)
Supplement: S3 Text — (DOCX) [file pone.0128895.s007.docx]

The UK TEDBC [10] study published results of 119,908 mammographic screenings of 39,773 cancer-free women in four age groups. Altogether, 459 women were found to have invasive breast cancer, 1.15% of entire group. A close look at these data reveal the disproportionate impact of a first screening on the cumulative total incidence and highlight how a first screening “finds” breast cancers that may have been present for many years and never recognized until a screening was undertaken. Thereafter only new and clearly much fewer breast cancers will be detected

**Table 3: Breast-cancer detection rates at screening (all cohorts) copied from** Moss SM, for the UK Trial of Early Detection of Breast Cancer Group: 16-year mortality from breast cancer in the UK trial of early detection of breast cancer. *Lancet* 1999; 353:1909-14.

| | **Age at Screening** | **Number Screened** | **Invasive Cancer (rate per 1000)** | **In-situ cancer (rate per 1000)** | | --- | --- | --- | --- | | **First Screening** |  |  |  | | 45-49 years | 15868 | 41 (2**⋅**6) | 21 (1**⋅**3) | | 50-54 years | 8543 | 37 (4**⋅**3) | 6 (0**⋅**7) | | 55-59 years | 8442 | 36 (4**⋅**3) | 7 (0**⋅**8) | | 60-64 years | 6636 | 45 (6**⋅**8) | 12 (1**⋅**8) | | > 65 years | 284 | 5 (17.6) | 0 | | Total | 39773 | 164 (4**⋅**1) | 46 (1**⋅**2) | |  |  |  |  | | **Mammographic Rescreening** |  |  |  | | 45-49 years | 11390 | 23 (2**⋅**0) | 6 (0**⋅**5) | | 50-54 years | 20638 | 42 (2**⋅**0) | 8 (0**⋅**4) | | 55-59 years | 19354 | 64 (3**⋅**3) | 17 (0**⋅**9) | | 60-64 years | 17859 | 49 (2**⋅**7) | 10 (0**⋅**6) | | > 65 years | 10894 | 41 (3**⋅**8) | 8 (0**⋅**7) | | Total | 80135 | 219 (2**⋅**7) | 49 (0**⋅**6) | |  |  |  |  | |
| --- | --- | --- | --- | --- | --- | --- | --- | --- | --- | --- | --- | --- | --- | --- | --- | --- | --- | --- | --- | --- | --- | --- | --- | --- | --- | --- | --- | --- | --- | --- | --- | --- | --- | --- | --- | --- | --- | --- | --- | --- | --- | --- | --- | --- | --- | --- | --- | --- | --- | --- | --- | --- | --- | --- | --- | --- | --- | --- | --- | --- | --- | --- | --- | --- | --- | --- | --- | --- |
|  |
